# Supplementary material for: Quaternary alloy quantum dots with widely tunable emission – a versatile system to fabricate dual-emission nanocomposites for bio-imaging
Source: Royal Society of Chemistry journal article supplement (doi:10.1039/c6ra07407c), 2016-01-01
Supplement: c6ra07407c1.pdf [file c6ra07407c1.pdf]

## Electronic supplementary information

# Quaternary Alloy Quantum Dots with Widely Tunable Emission – A Versatile System to Fabricate the Dual-Emission Nanocomposites for Bio-Imaging

Jie Wang,<sup>a,1</sup> Tao Deng,<sup>a,1</sup> Dawei Deng,<sup>\*a,b,1</sup> Rong Zhang,<sup>a</sup> Yueqing Gu<sup>\*a,b</sup> and Xiaoming Zha<sup>\*a,c</sup>

<sup>a</sup> Department of Biomedical Engineering, China Pharmaceutical University, Nanjing 210009, China. E-mail:

dengdawei@cpu.edu.cn; xmzha@cpu.edu.cn; guyueqingsubmission@hotmail.com

<sup>b</sup> State Key Laboratory of Natural Medicines, China Pharmaceutical University, Nanjing 210009, China

<sup>c</sup> Jiangsu Key Laboratory of Drug Screening, China Pharmaceutical University, Nanjing 210009, China

<sup>1</sup>Jie Wang, Tao Deng and Dawei Deng contributed equally to this work.

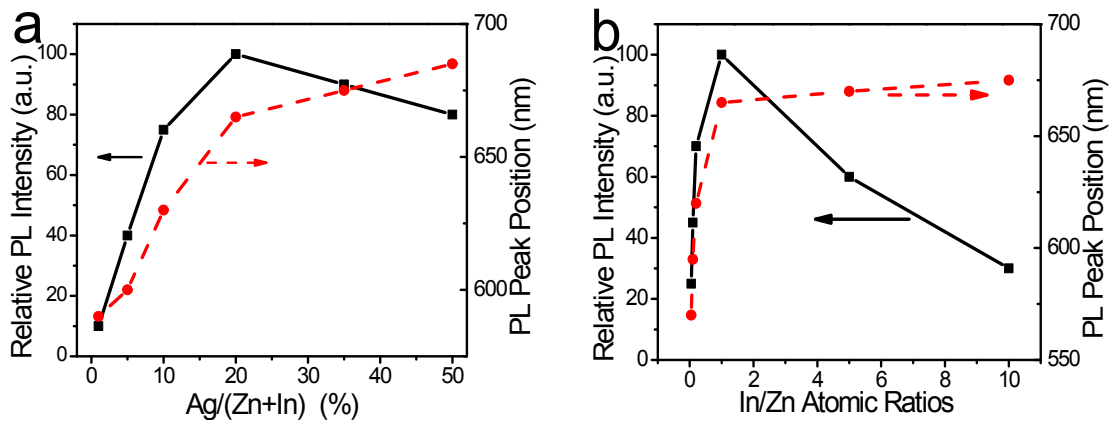

**Fig. S1** Summarization of the dependence of relative PL intensity and peak position of the Zn-Ag-In-Se core QDs on (a) the Ag/(Zn+In) ratio ( $[In]=[Zn]=19$  mM) and (b) the In/Zn ratio ( $[Ag]=7.6$  mM).

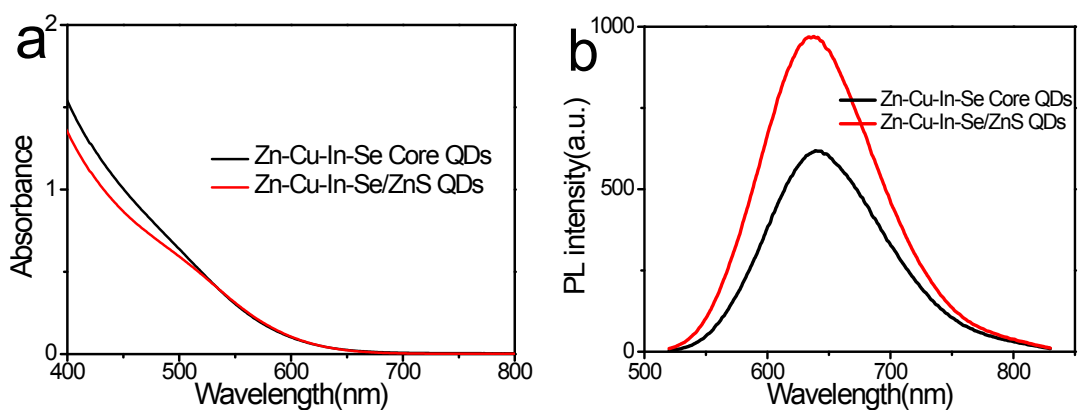

**Fig. S2** Absorption (a) and PL (b) spectra of initial ZCISE core QDs and the resulting ZCISE/ZnS core/shell QDs ( $\lambda_{ex}=450$  nm)

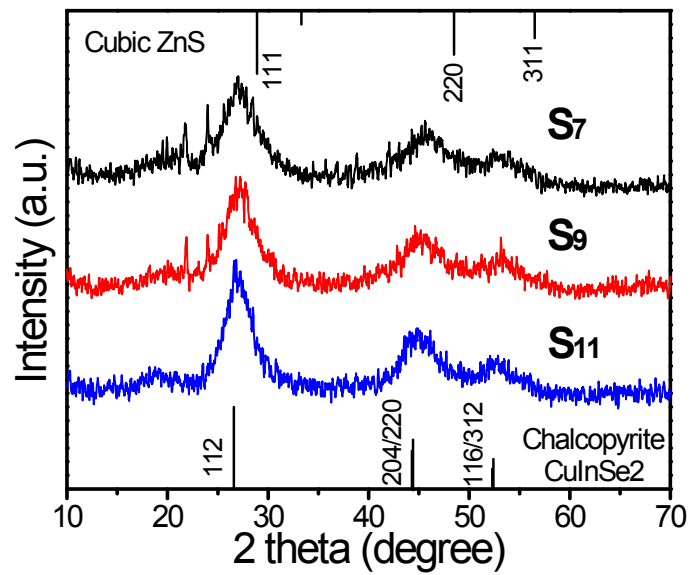

**Fig. S3** The XRD patterns of the samples S7, S9 and S11. The pattern of CuInSe<sub>2</sub> chalcopyrite is provided as a reference.

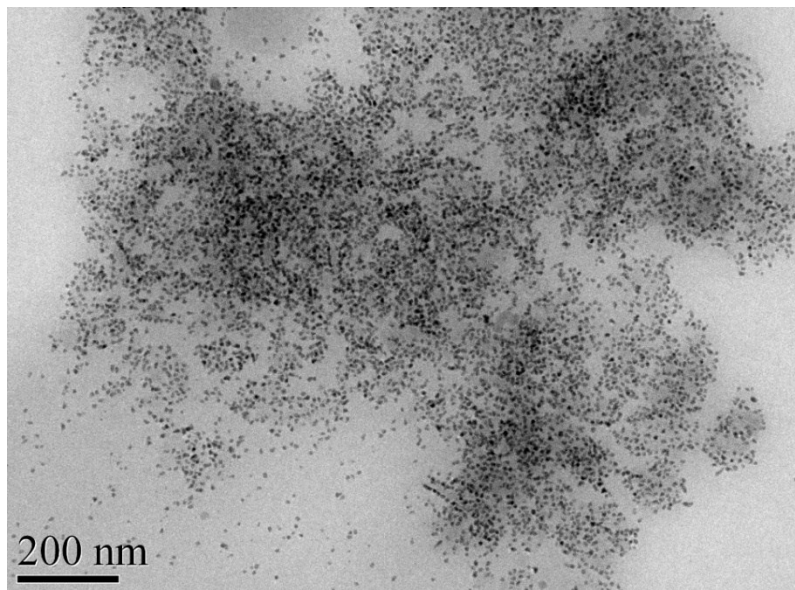

**Fig. S4** TEM image of the as-prepared ZCISe/ZnS core/shell QDs (the sample S11). The average diameter is about 6 nm.

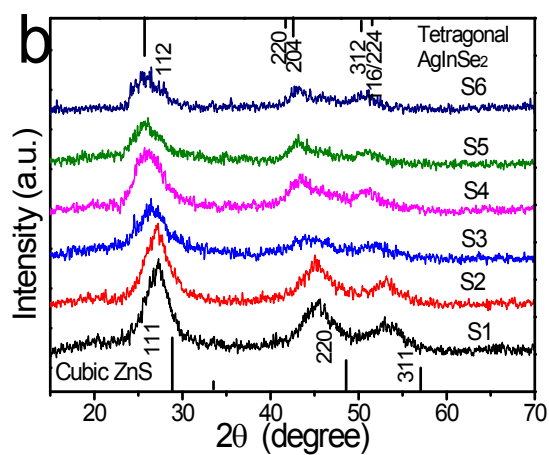

**Fig. S5** The XRD patterns of the samples S1–S6.

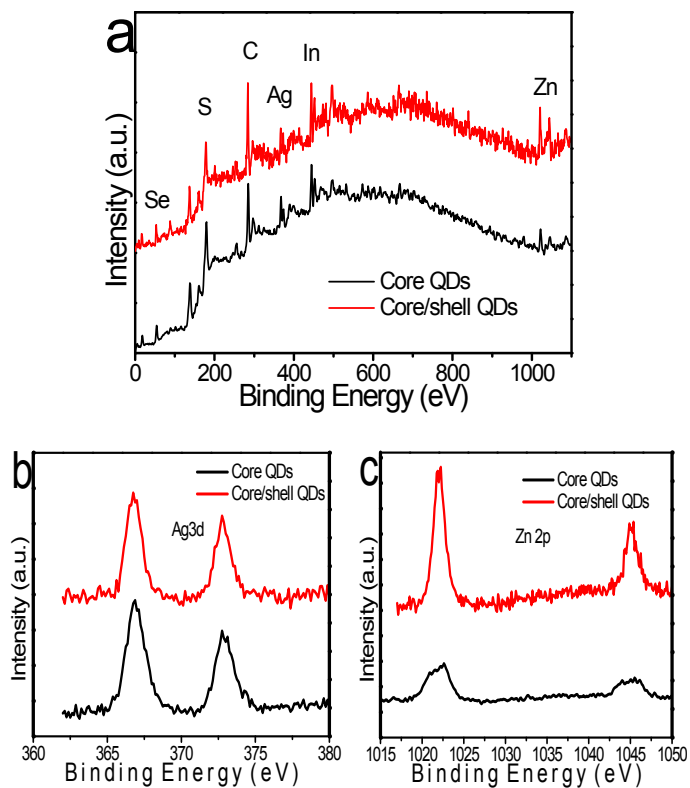

**Fig. S6** (a) XPS survey spectra of initial ZAISe core and as-prepared ZAISe/ZnS core/shell QDs, and the corresponding XPS spectra of (b) Ag 3d and (c) Zn 2p. These QDs all contain Zn, Ag, In, Se and S, while the Zn content in core/shell QDs increases as compared with that in core QDs. Here, the content of the S element in QDs cannot be determined accurately due to the presence of DT.

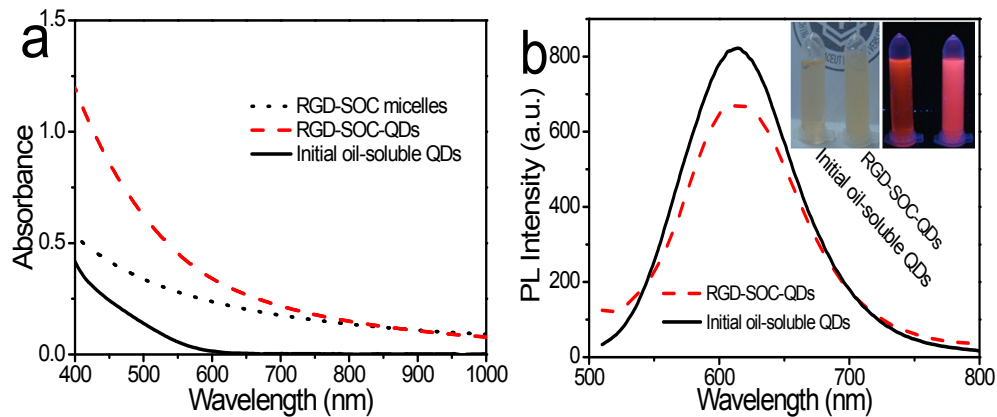

**Fig. S7** The absorption spectrum of RGD-SOC micelles, and the absorption and PL spectra of ZAlSe/ZnS QDs before and after transferred into RGD-SOC micelles (here, RGD-SOC micelles do not show detectable fluorescence signal). The insets of panel b represent the corresponding digital photographs under room light and UV lamp ( $\lambda_{\max}=365$  nm).

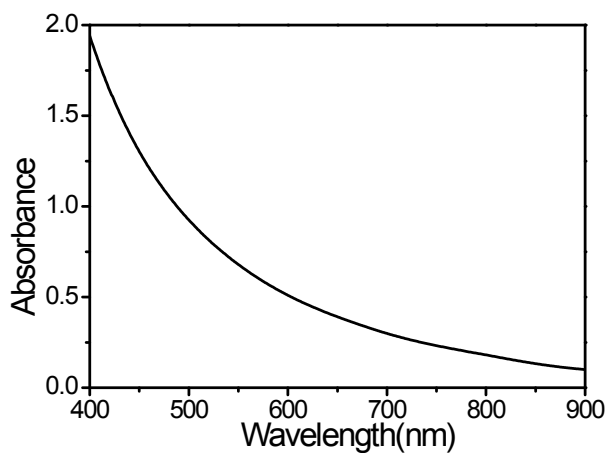

**Fig. S8** The absorption spectrum of the mixed ZAlSe/ZnS (sample S3) and ZClSe/ZnS QDs (the sample S11) after water transfer using RGD-SOC micelles.

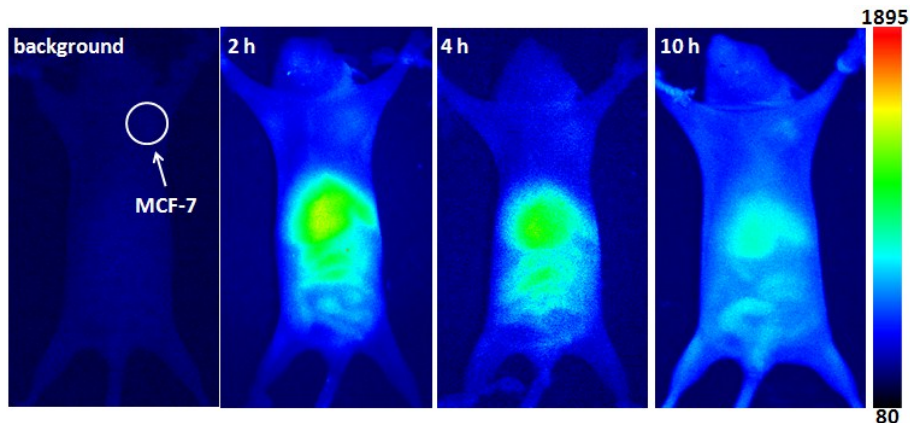

**Fig. S9** The dynamic distribution of the mixed QDs-loaded RGD-SOC micelles in nude mice bearing  $\alpha_v\beta_3$  integrin receptor-negative MCF-7 tumors monitored using the NIR fluorescence imaging system ( $\lambda_{ex}=766$  nm).

**Table S1.** Summarization of the Zn/Ag/In/Se molar ratios in the ZAlSe/ZnS core/shell QDs (namely, the sample S1–S6) measured by XPS, in which the content of Se in QDs was normalized. The corresponding content of element S in QDs cannot be determined by XPS because of the presence of the dodecanethiol on the QDs surface.

| Sample | Zn   | Ag   | In   | Se |
|--------|------|------|------|----|
| S1     | 1.28 | 0.06 | 0.1  | 1  |
| S2     | 1.1  | 0.1  | 0.26 | 1  |
| S3     | 1.1  | 0.16 | 0.43 | 1  |
| S4     | 0.93 | 0.28 | 0.53 | 1  |
| S5     | 0.9  | 0.46 | 0.54 | 1  |
| S6     | 0.61 | 0.45 | 0.49 | 1  |
